# Supplementary material
Source: PubMed Central journal article supplement (PMC2663740)

## SUPPLEMENTARY MATERIAL

**Table A.** Sequence of the synthetic oligonucleotides used for site-directed mutagenesis of cDNA of the arabidopsis 3 $\beta$ HSD/D gene.

| Strain             | Sense oligonucleotide sequence (5' – 3')      |
|--------------------|-----------------------------------------------|
| D39V               | CACGTTTCGTATCGCCGTTTTAGCTCCTGCGATAGTG         |
| D70V               | CAATACGTCCCCGCTGTTCTTCGGAACAAAACACTCAAG       |
| D70A               | CAATACGTCCCCGCTGCTCTTCGGAACAAAACACTCAAG       |
| T129V              | GAGGCTAATCTATGTAAGTTCTCCGAGTGTTGTGTTTGACGGG   |
| S131A              | GAGGCTAATCTATACAAGTGCTCCGAGTGTTGTGTTTGACGG    |
| S133A              | GGCTAATCTATACAAGTTCTCCGGCTGTTGTGTTTGACGGGGTC  |
| S133T              | CTATACAAGTTCTCCGACTGTTGTGTTTGACGGGGTC         |
| S133Y              | GGCTAATCTATACAAGTTCTCCGTAATGTTGTGTTTGACGGGGTC |
| Y159F              | CCACCTAAGCATAAATGATTCATTTTCAGCTACTAAAGCTGAAGG |
| K163I              | GATTCATATTCAGCTACTATAGCTGAAGGGGAAGCTTTGATTTTG |
| R318I              | CCAGTGCTAACACCTTCTATTGTTAGGCTACTCTCTTGC       |
| R326I              | GGCTACTCTCTTGCAACATAACATTTGATTCTTCAAAGCAAGG   |
| $\Delta$ [288-303] | CAAGTATAAAGATACCTGCAGGACCGTATGGGATGAAAGTAC    |

## LEGEND OF FIGURE A

Examples of double-reciprocal plots for recombinant *At*3 $\beta$ HSD/D activities by microsomes of *S.cerevisiae erg26* null mutant expressing wild-type *At*3 $\beta$ HSD/D and various active mutant enzymes. Assays were conducted as described in the Materials and Methods. Straight lines were fitted by using a computer-assisted least-squares method.

**Panel A :** *4 $\alpha$ -carboxy-cholest-7-en-3 $\beta$ -ol* [2] reaction by microsomes expressing wild-type *At*3 $\beta$ HSD/D (■), and mutants R318I (○), S131A (●), and S133A (▲) enzymes.

**Panel B :** *4 $\alpha$ -carboxy-4 $\beta$ -methyl-cholest-8,24-dien-3 $\beta$ -ol* [3] reaction by microsomes expressing wild-type *At*3 $\beta$ HSD/D (●), and mutant S133A (○) enzymes.

**Panel C :** Reaction by microsomes expressing mutant S133T with *4 $\alpha$ -carboxy-cholest-7-en-3 $\beta$ -ol* [2] (■) and *4 $\alpha$ -carboxy-4 $\beta$ -methyl-cholest-8,24-dien-3 $\beta$ -ol* [3] (●).

Figure A

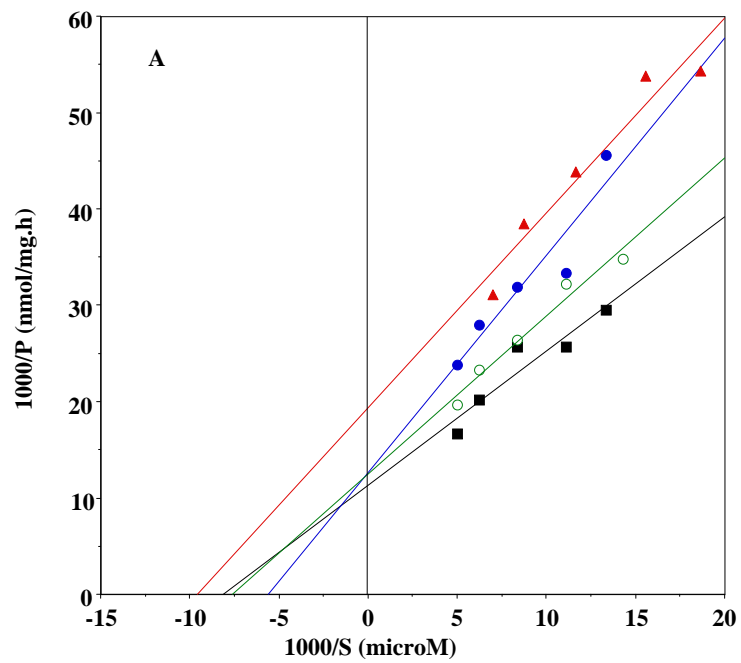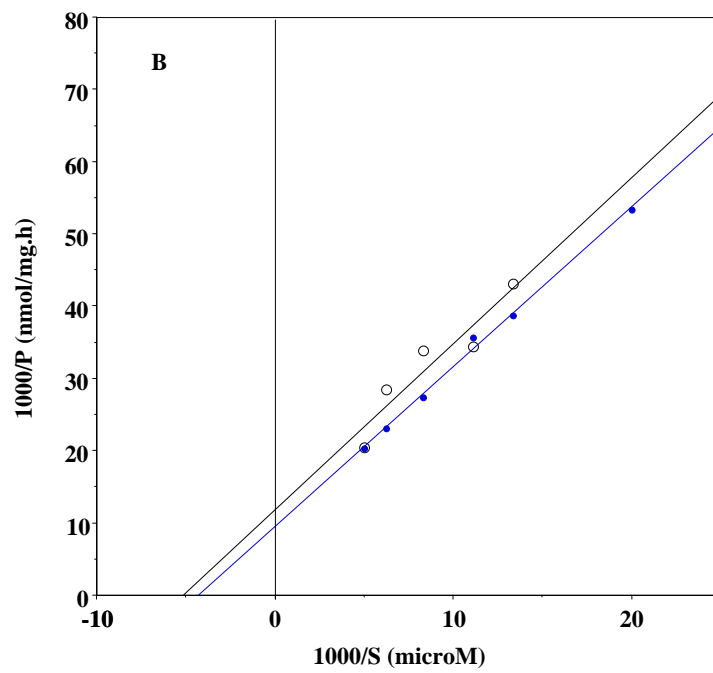

Figure A

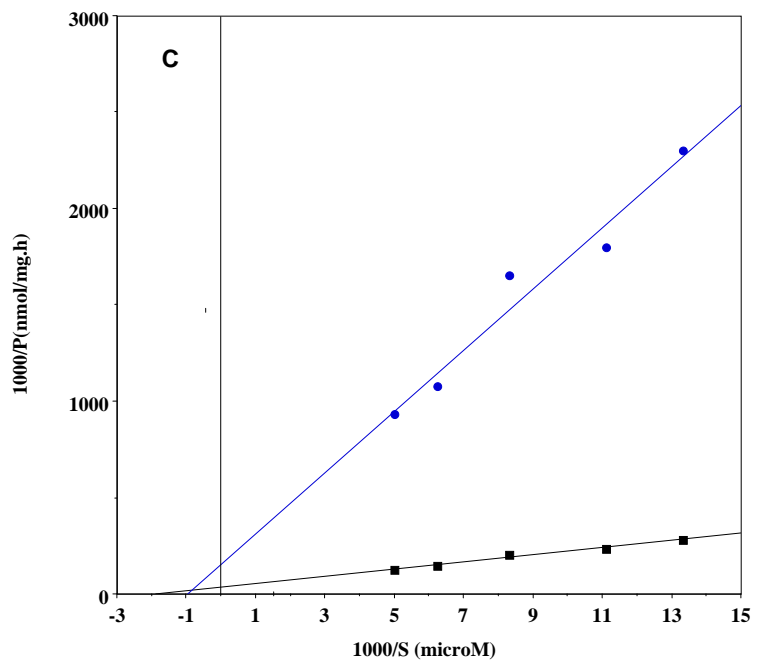

Supplement: pp.108.132282_1.pdf [file pp.108.132282_1.pdf]
